# Supplementary material for: Coalescing solar-to-chemical and carbon circular economy: mediated by metal-free porphyrin and triazine-based porous organic polymer under natural sunlight
Source: Royal Society of Chemistry journal article supplement (doi:10.1039/d3ta05160a), 2023-01-01
Supplement: d3ta05160a1.pdf [file d3ta05160a1.pdf]

## Supplementary Information

### **Coalescing solar-to-chemical and carbon circular economy: Mediated by metal-free porphyrin and triazine-based porous organic polymer under natural sunlight**

Neha Saini, Neha Sharma, Deepak Kumar Chauhan, Rishu Khurana, Md Ehesan Ali and Kamalakannan Kailasam\*

**Advanced Functional Nanomaterials, Institute of Nano Science and Technology (INST), Knowledge city, Sector-81, Manauli, SAS Nagar, 140306 Mohali, Punjab, India.**

\*Email: [kamal@inst.ac.in](mailto:kamal@inst.ac.in)

### **Contents:**

**Synthesis of TPT-CHO**

**Apparent Quantum Yield calculations**

**Solar-to-fuel conversion efficiency**

**Supplementary Figures S1-S24**

**Supplementary Scheme S1-S2**

**Supplementary Tables S1-S8**

## Synthesis and Characterization

### Synthesis of tris- (4-formylphenoxy)-1,3,5-triazine (TPT-CHO)

TPT-CHO was synthesized as per the reported procedure<sup>1,2</sup> 4-hydroxy benzaldehyde (1.6 g, 13.1 mmol), cyanuric chloride (0.6 g, 3.25 mmol) and sodium carbonate (2.0 g, 18.8 mmol) were suspended into 15 ml of 1,4-dioxane taken in a round bottom flask. This mixture was refluxed for 24 h and then allowed to cool down. The precipitates were filtered out and washed with 10% aqueous Na<sub>2</sub>CO<sub>3</sub> solution and distilled water. The white solid product was recrystallized with ethyl acetate to afford white fluffy precipitates of TPT-CHO which were dried at 70 °C in a vacuum oven.

<sup>1</sup>H NMR (CDCl<sub>3</sub>, 400 MHz): 9.95 (s, 3H), 7.91 (d, 6H), 7.31 (d, 6H) ppm. <sup>13</sup>C NMR (CDCl<sub>3</sub>, 400 MHz): 190.6, 173.2, 155.7, 134.4, 131.3, 122.2 ppm.

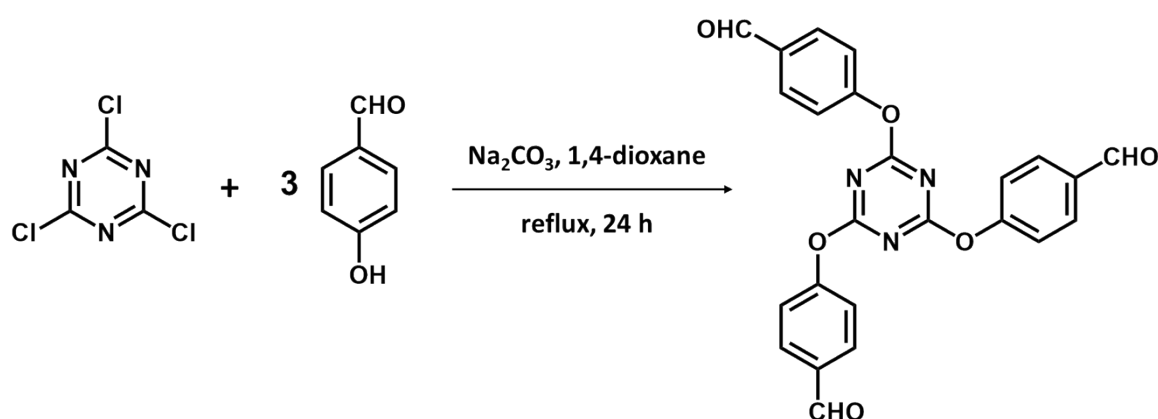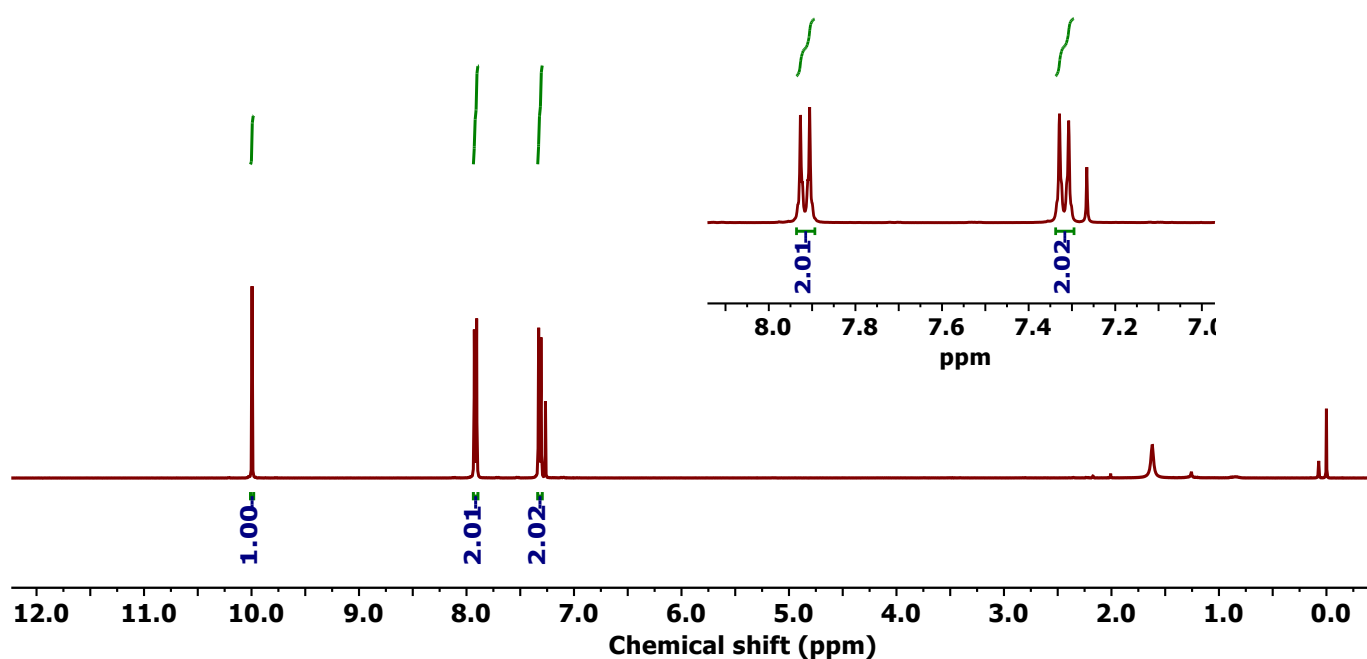

<sup>1</sup>H NMR spectra of TPT-CHO in CDCl<sub>3</sub>

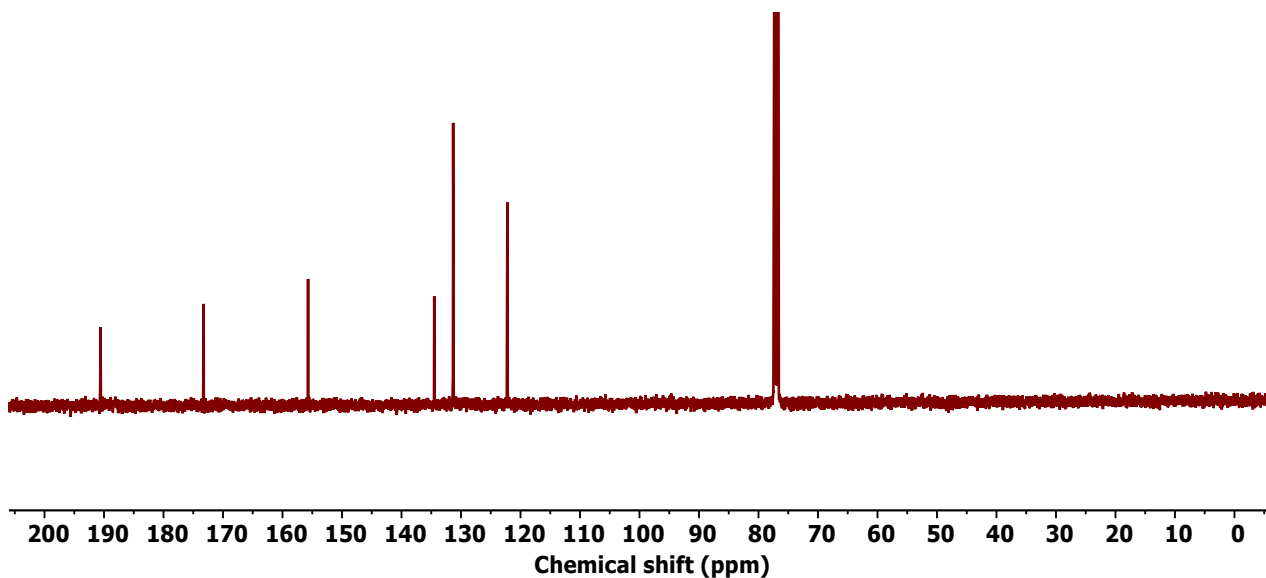

$^{13}\text{C}$  NMR spectra of TPT-CHO in  $\text{CDCl}_3$

### Apparent Quantum Yield (AQY%) calculations

Apparent Quantum Yield is widely used to calculate the performance of the photocatalyst. It is defined as the number of electrons reacted to the number of incident photons. The apparent quantum yield (AQY) for  $\text{CO}_2$  photoreduction reaction was evaluated with 5mg of TPT-porp under light irradiation for 2 h using 400 W Xe lamp with different band-pass filters. Assume that the incident photons are all absorbed by the sample. The AQY was calculated according to the below equation:

$$AQY (\%) = \frac{\text{Number of reacted electrons}}{\text{Number of incident photons}} \times 100 \quad (1)$$

Since the photoreduction of  $\text{CO}_2$  to CO involves two electrons therefore, AQY is given as equation (2)

$$AQY (\%) = \frac{2 \times \text{Number of CO evolved}}{\text{Number of incident photons}} \times 100 \quad (2)$$

Number of incident photons is defined as the ratio of total energy incident to the energy of single photon i.e., eq (3)

$$\text{Number of incident photons} = \frac{E_{total}}{E_{photon}} \quad (3)$$

Total energy incident,  $E_{total}$  is given as

$$E_{total} = I \times A \times t \quad (4)$$

I = intensity of incident light ( $\text{Wcm}^{-2}$ )

A = area of irradiation ( $\text{cm}^2$ )

t = time of irradiation (s)

Energy of one photon ( $E_{\text{photon}}$ ) with wavelength of  $\lambda_{\text{inc}}$  is calculated as

$$E_{\text{photon}} = \frac{hc}{\lambda_{\text{inc}}} \quad (5)$$

h (Js) is Planck's constant

c ( $\text{ms}^{-1}$ ) is the speed of light

$\lambda_{\text{inc}}$  (m) is the wavelength of monochromatic light

Combining equations (3), (4) and (5)

$$\text{Number of incident photons} = \frac{I \times A \times t \times \lambda_{\text{inc}}}{hc} \quad (6)$$

$$\text{Number of CO evolved} = \eta_{\text{CO}} \times N_A \quad (7)$$

where,  $\eta_{\text{CO}}$  is the moles of CO evolved upon irradiation of incident light for 't' time duration

$N_A$  is the Avagadro's number

Using equations (2), (6) and (7)

$$\text{AQY (\%)} = \frac{2 \times \eta_{\text{CO}} \times N_A \times h \times c}{I \times A \times t \times \lambda_{\text{inc}}} \times 100$$

### **Solar-to-fuel conversion efficiency for CO (STF%)**

The solar-to-fuel conversion efficiency of CO was determined by the reaction carried out under natural sunlight. The STF efficiency is calculated using formula,

$$\text{STF efficiency (\%)} = \frac{[\text{Chemical energy produced}]}{[\text{Solar energy input}]}$$
$$\text{STF efficiency (\%)} = \frac{[\Delta G \text{ for CO production (J/mol)}] [\text{CO formed (mol/s)}]}{[\text{Irradiation intensity (W/cm}^2\text{)}] [\text{Irradiation area (cm}^2\text{)}]} \times 100$$

where,  $\Delta G$  the free energy change for  $\text{CO}_2$  to CO is 257 kJ/mol

amount of CO formed in 1 h (with 5 mg of catalyst TPT-porp) under natural sunlight (intensity = 44.65 mW/cm<sup>2</sup>) with irradiation area of 6.44 cm<sup>2</sup> is 2.7 x 10<sup>-9</sup> mol/s

$$STF \text{ efficiency (\%)} = \frac{[(2.57 \times 10^5 \text{ (J/mol)})] [2.7 \times 10^{-9} \text{ (mol/s)}]}{[4.46 \times 10^{-2} \text{ (W/cm}^2\text{)}] [6.44 \text{ (cm}^2\text{)}]} \times 100$$

$$STF \text{ efficiency (\%)} = 0.241\%$$

## Supplementary Figures

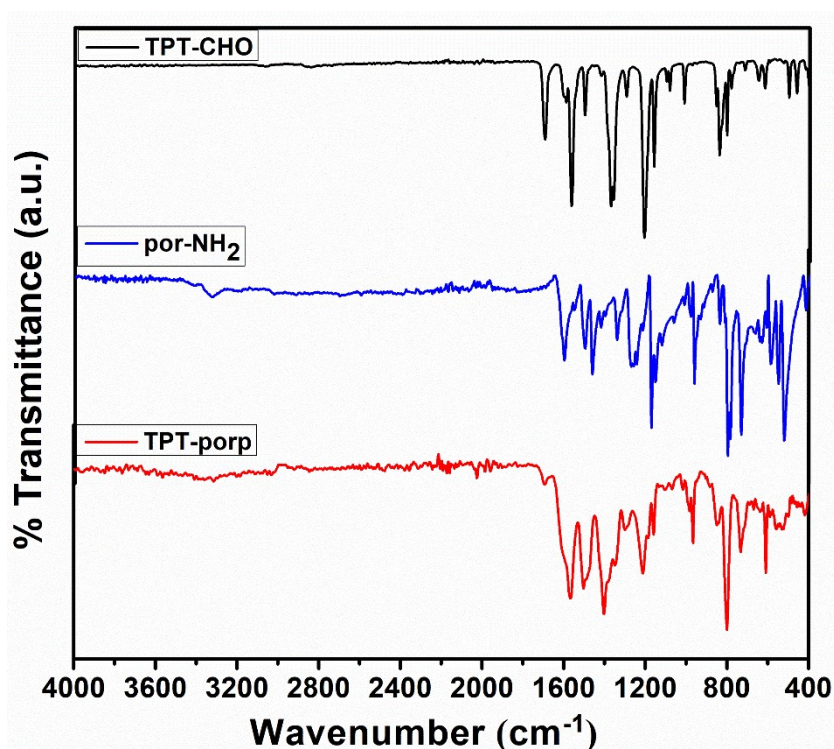

Fig. S1 Comparison of FTIR spectra of TPT-CHO, porp-NH<sub>2</sub>, and TPT-porp.

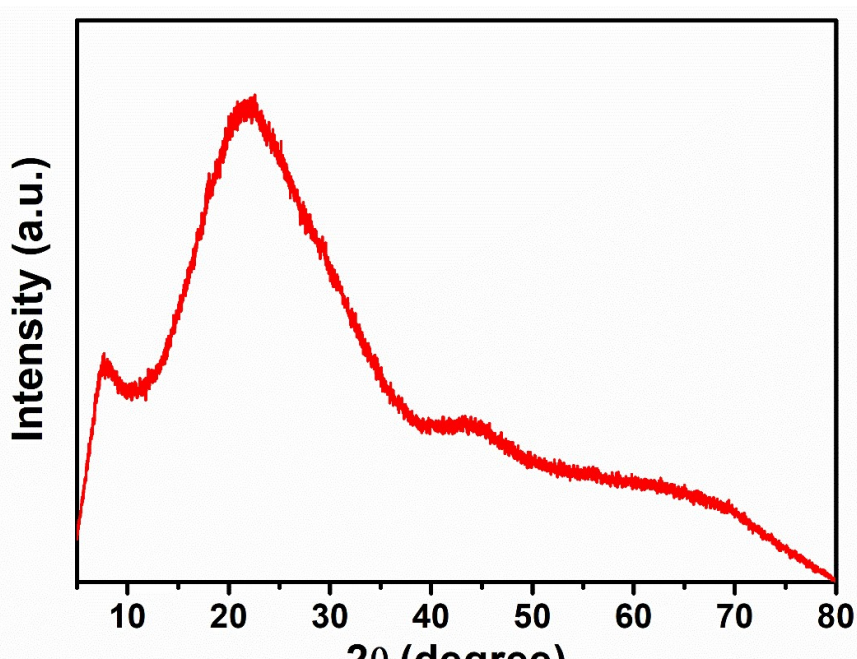

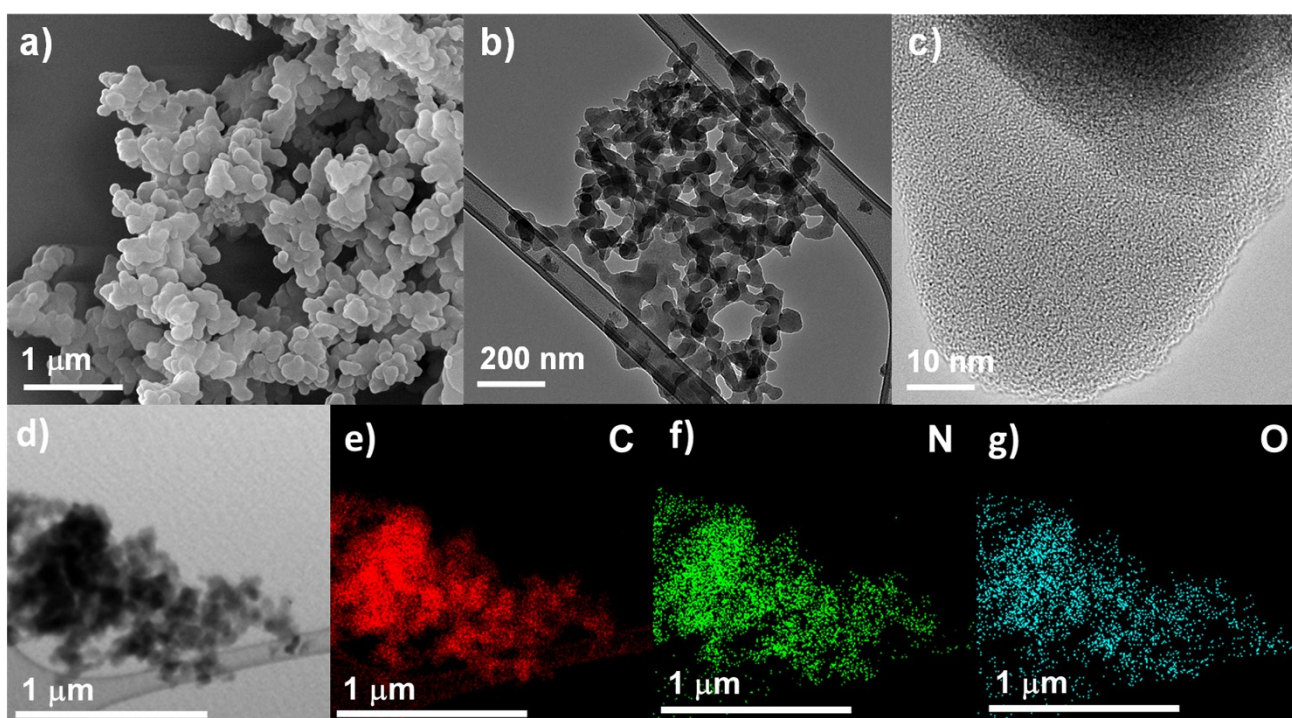

**Fig. S3** (a) FESEM images, (b) TEM images, and (d-g) TEM elemental mapping (showing elements C, N and O) of TPT-porp.

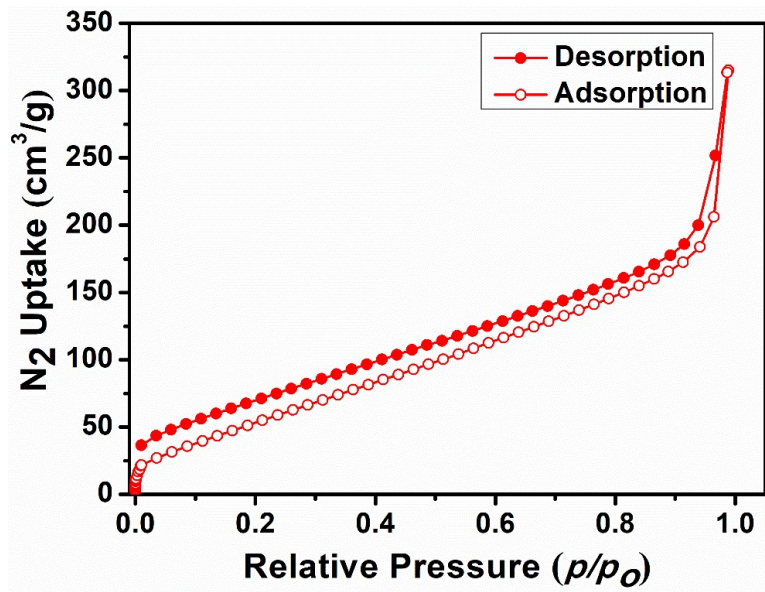

Fig. S4 N<sub>2</sub> adsorption and desorption isotherm of TPT-porp.

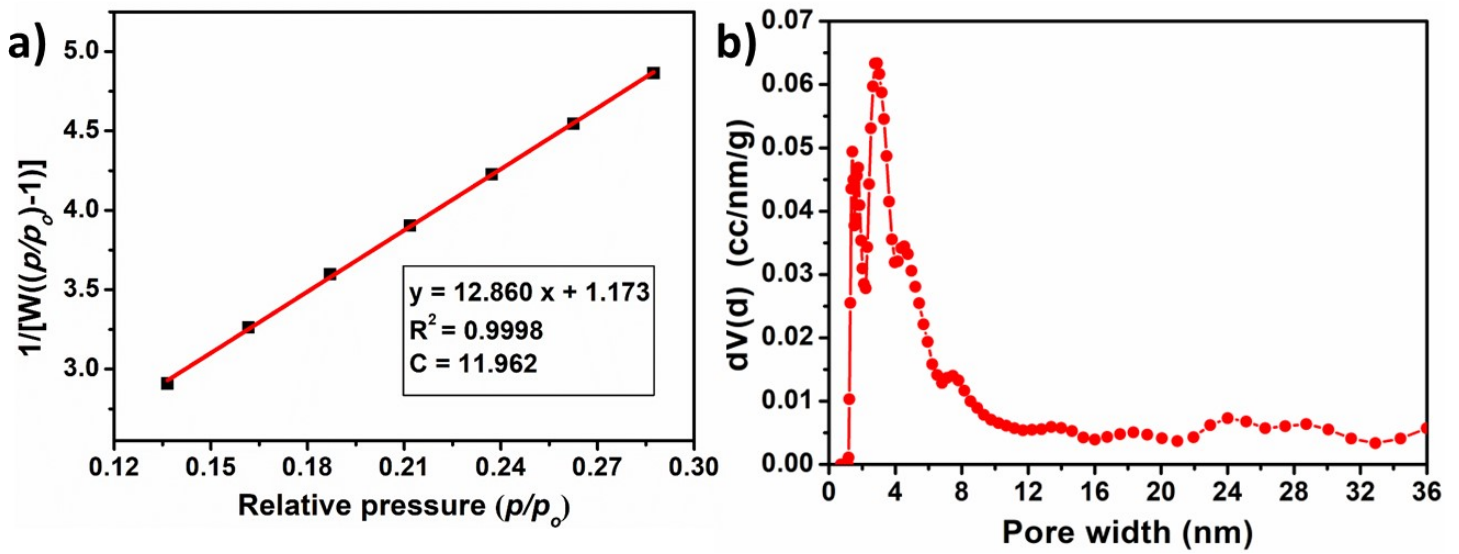

Fig. S5 (a) Linear BET plot and (b) Pore size distribution of TPT-porp.

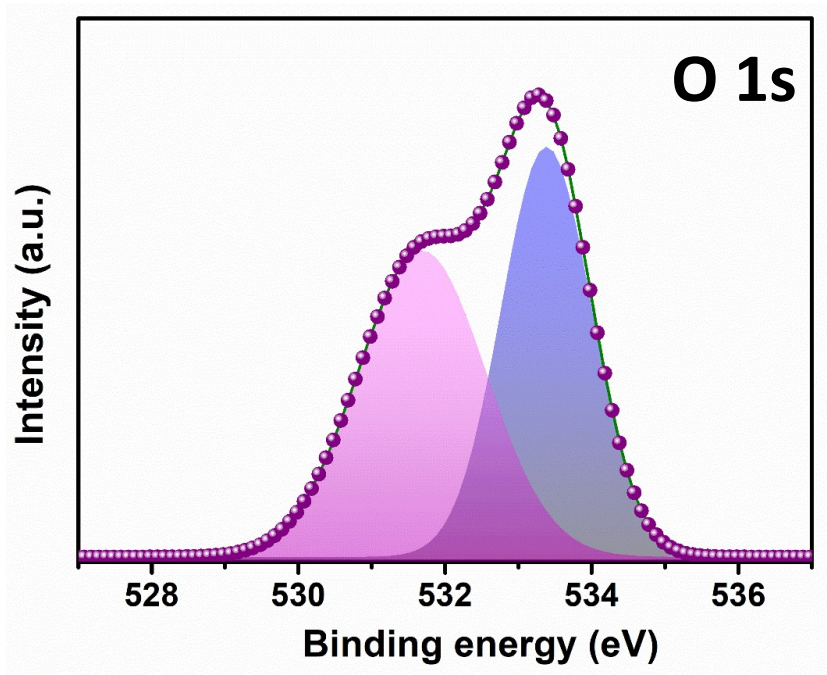

Fig. S6 High-resolution XPS O 1s spectra of TPT-porp.

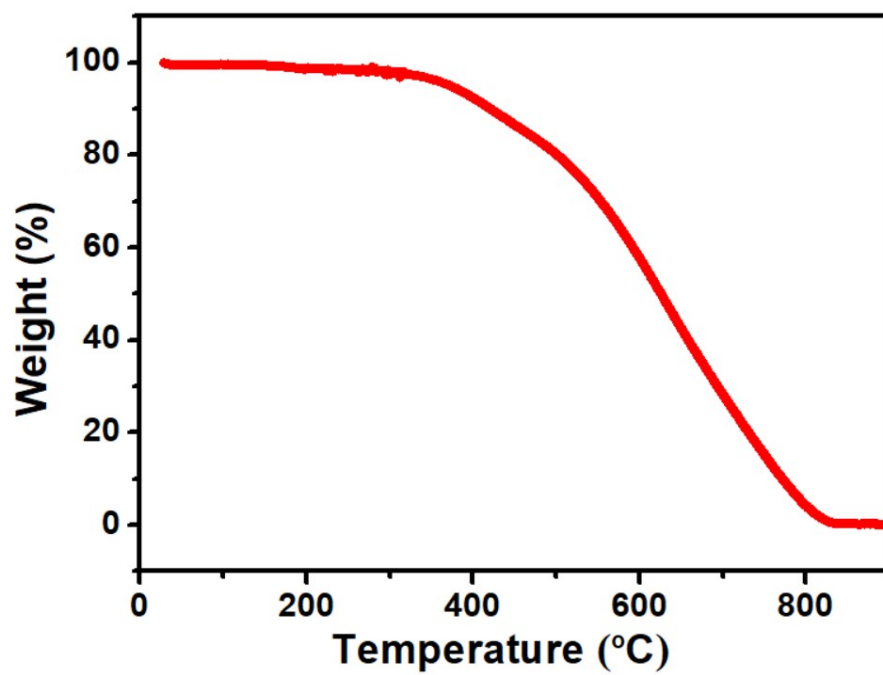

Fig. S7 TGA plot of TPT-porp (under N<sub>2</sub> atmosphere).



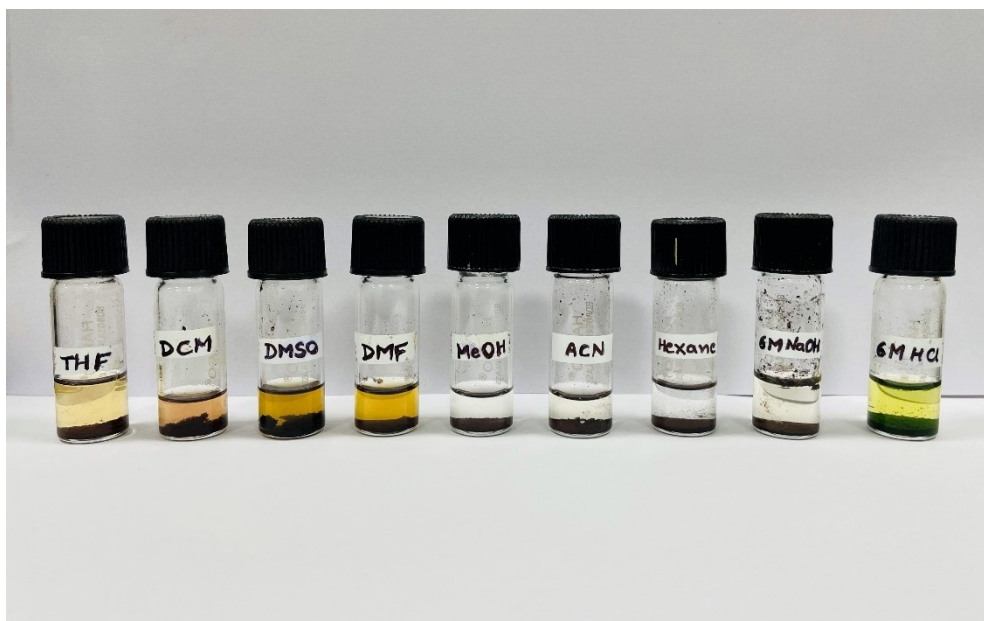

Fig. S8 TPT-porp immersed in various organic solvents, 6 M NaOH and 6 M HCl for 3 days.

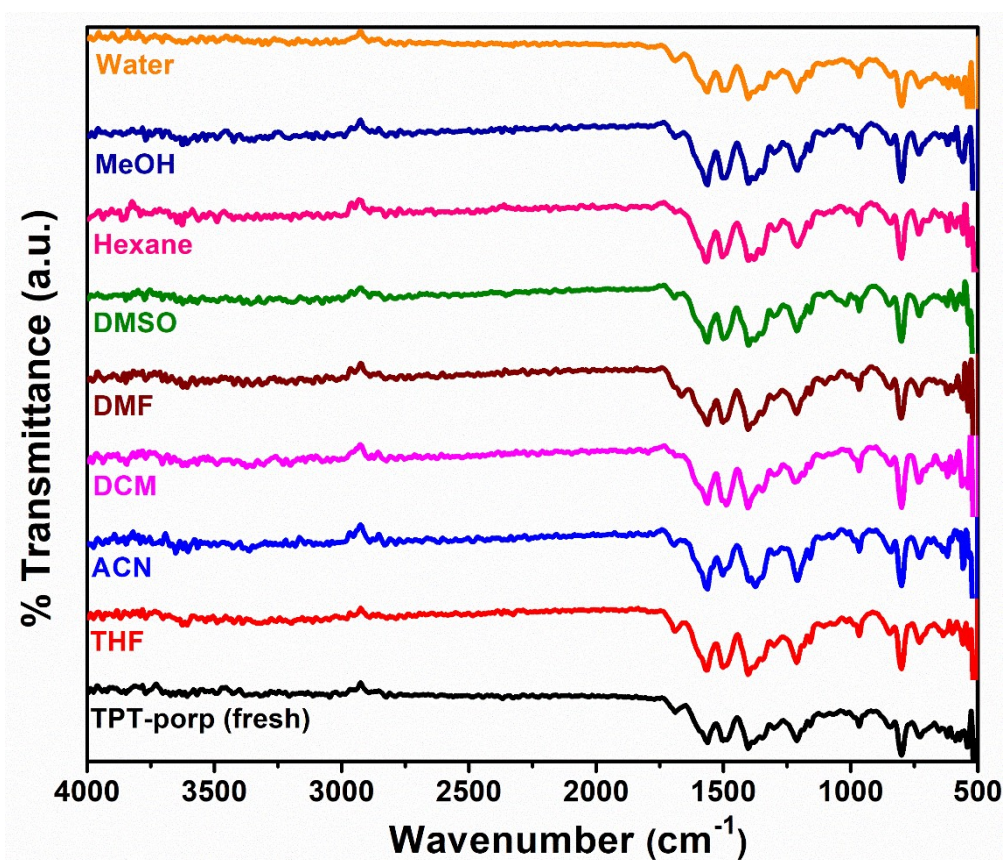

Fig. S9 FTIR spectra of TPT-porp after being immersed into various organic solvents for 3 days.

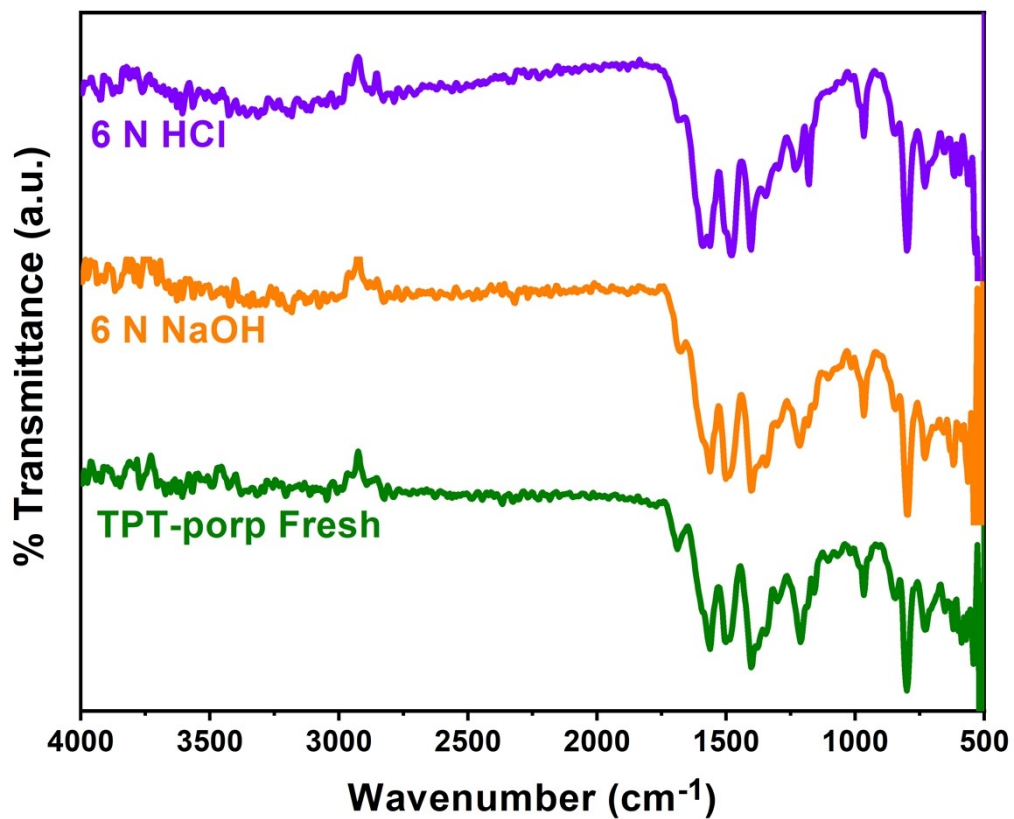

**Fig. S10** Comparison of FTIR spectra of TPT-porp after being immersed into 6 N NaOH and 6 N HCl for 3 days.

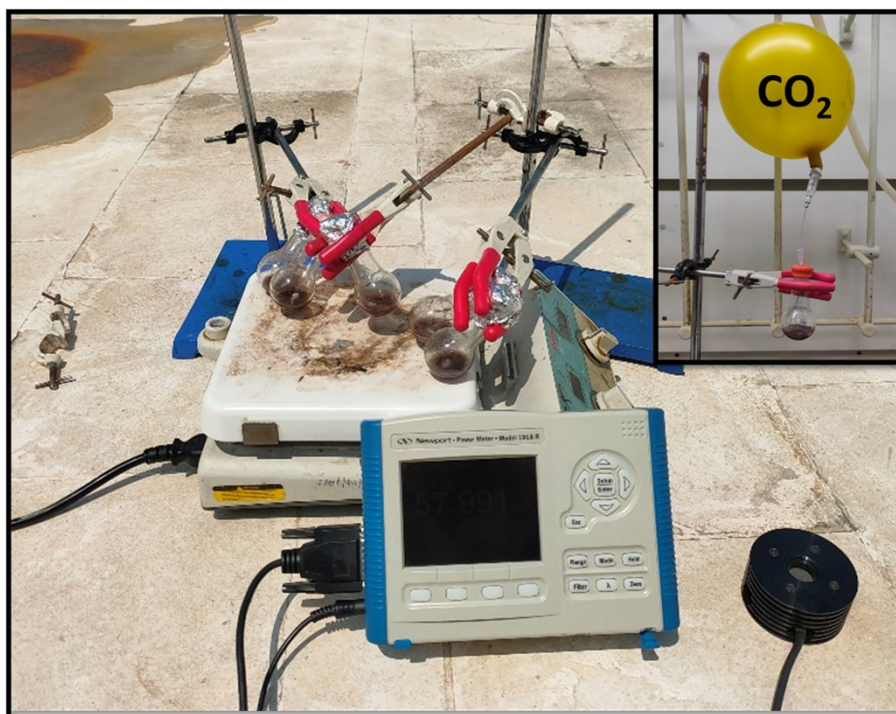

**Fig. S11** Photocatalytic reaction setup of simultaneous  $\text{CO}_2$  reduction and benzylamine homocoupling under natural sunlight. The inset shows purging of reaction mixture using a  $\text{CO}_2$ -filled balloon before irradiation.

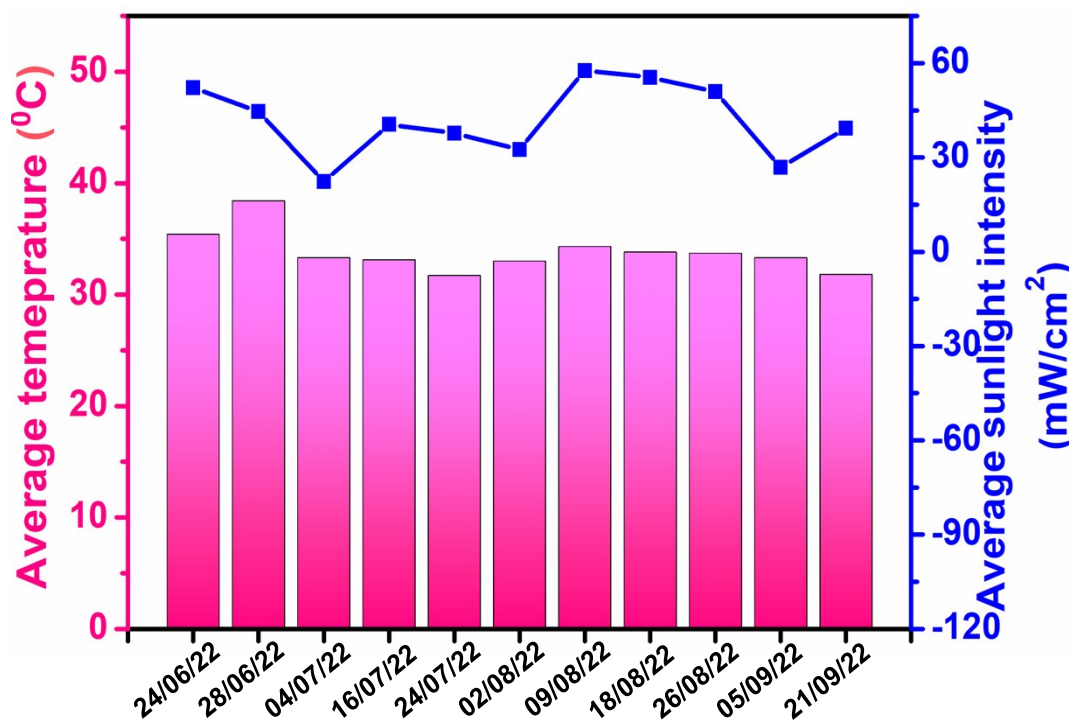

**Fig. S12** The average temperature and average solar intensity during this photocatalytic study. The average sunlight intensity was measured by a Newport power meter (Model number: 1918-R).

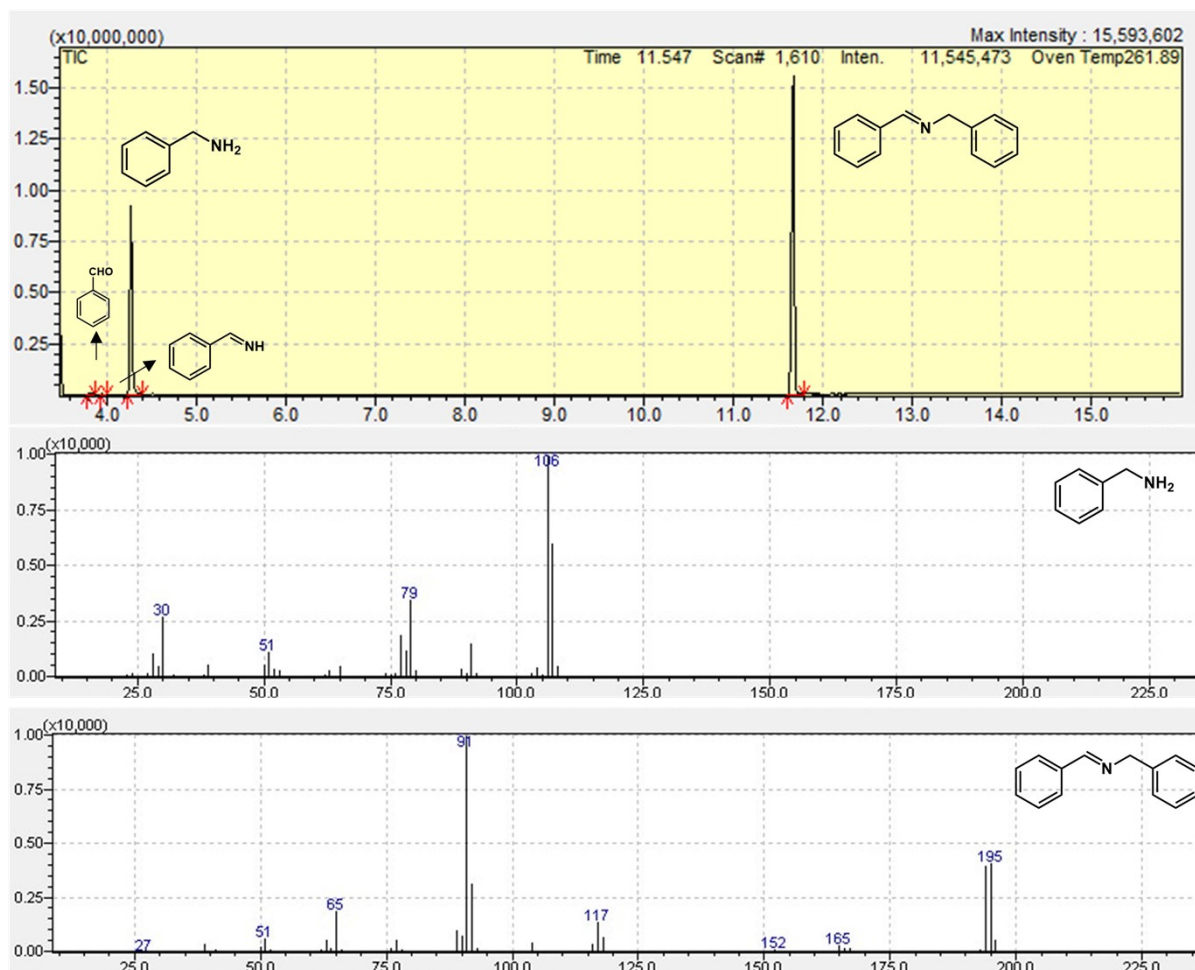

**Fig. S13** GC-MS chromatogram for the analysis of liquid product.

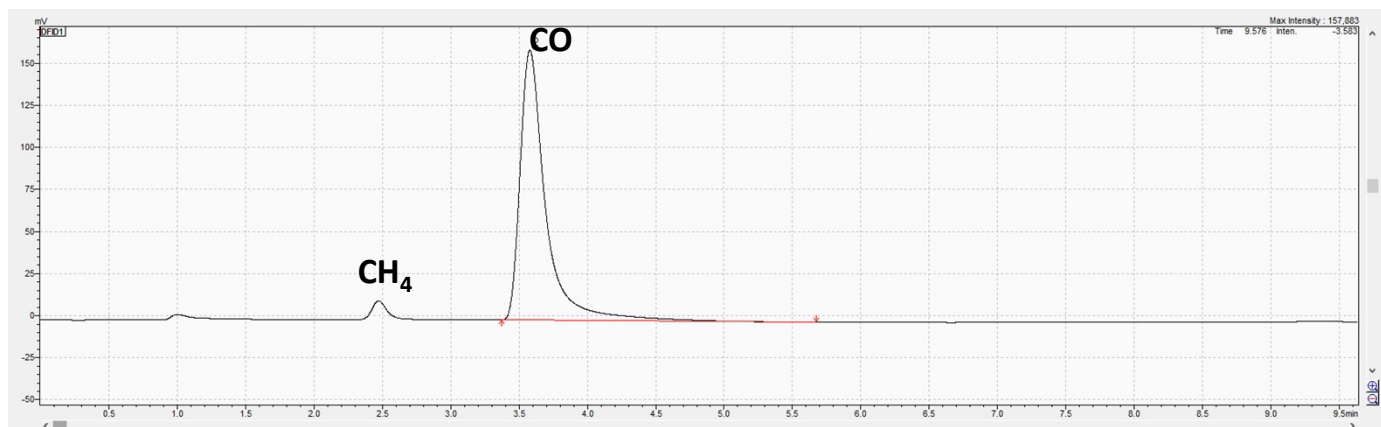

Fig. S14 GC chromatogram for the analysis of gaseous product.

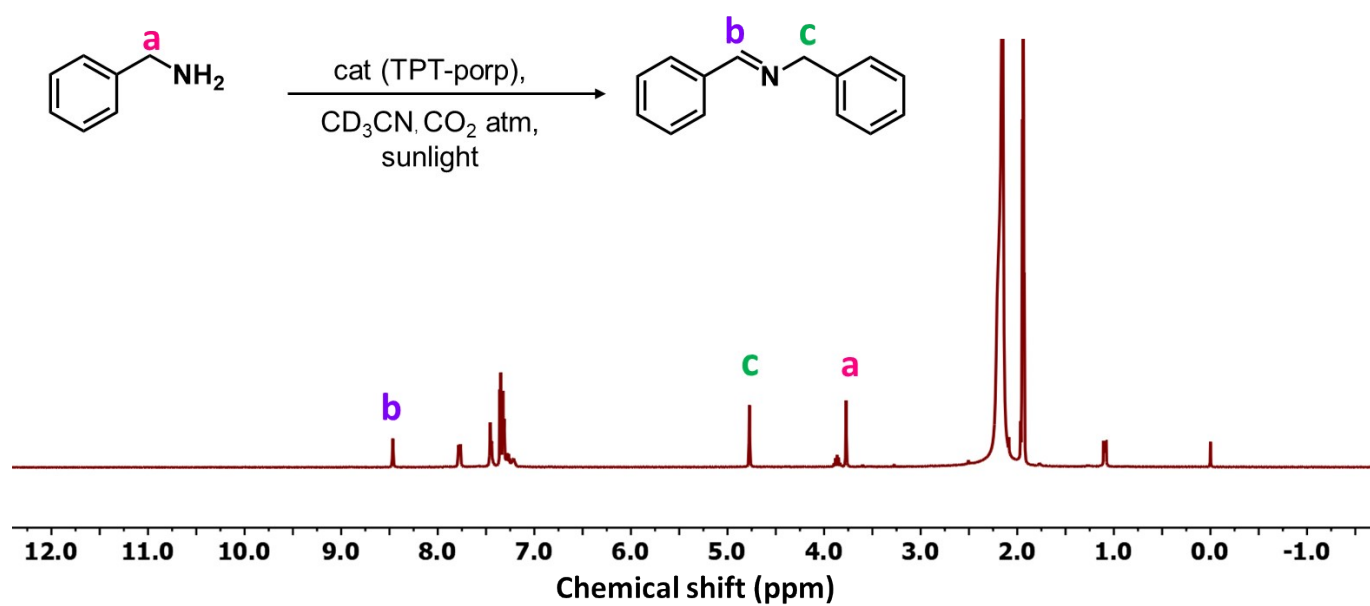

Fig. S15  $^1\text{H}$  NMR of the reaction mixture in deuterated acetonitrile.

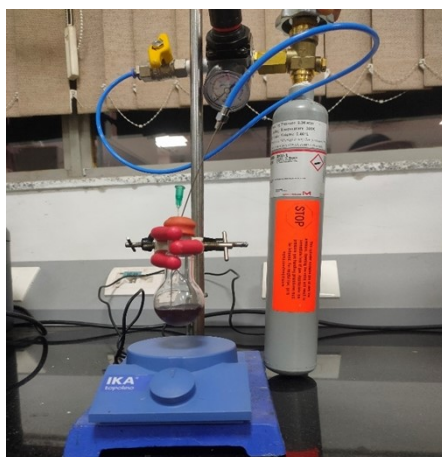

Fig. S16  $^{13}\text{CO}_2$  purging setup for labelling experiments.

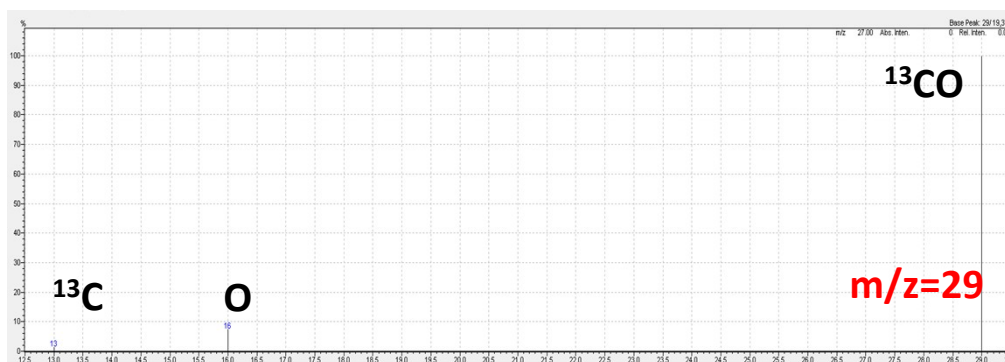

Fig. S17 GC-MS analysis of the generated CO using  $^{13}\text{CO}_2$  as feedstock.

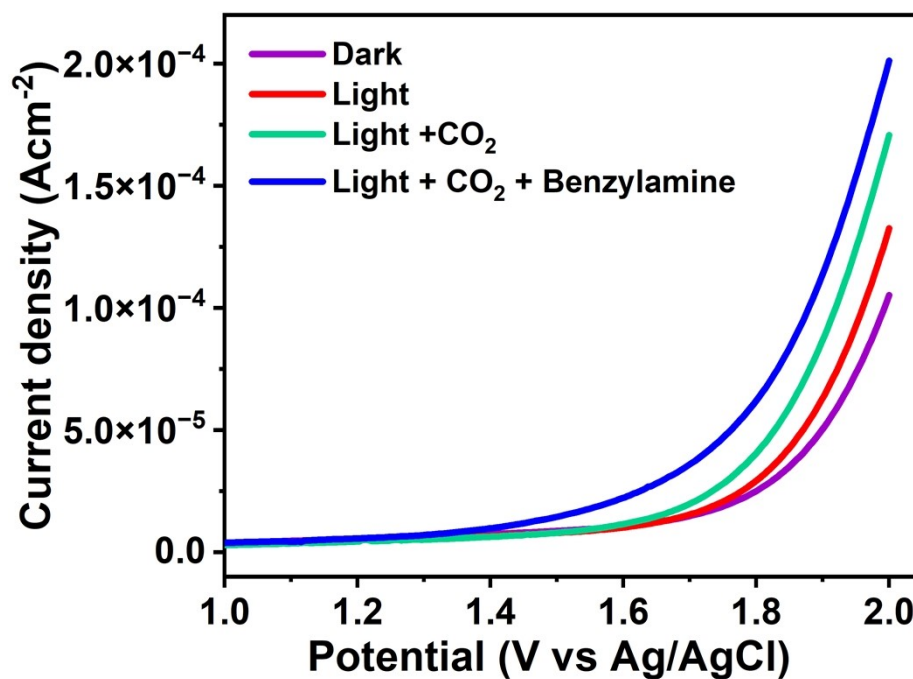

Fig. S18 LSV of TPT-porp without and with addition of benzylamine in presence of  $\text{CO}_2$ .

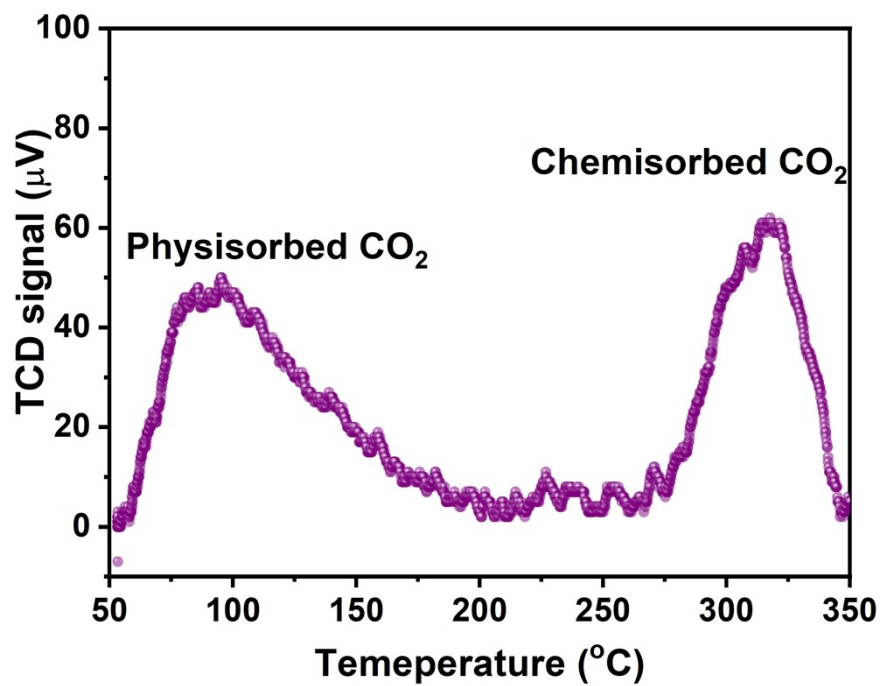

Fig. S19 CO<sub>2</sub>-TPD data of TPT-porp.

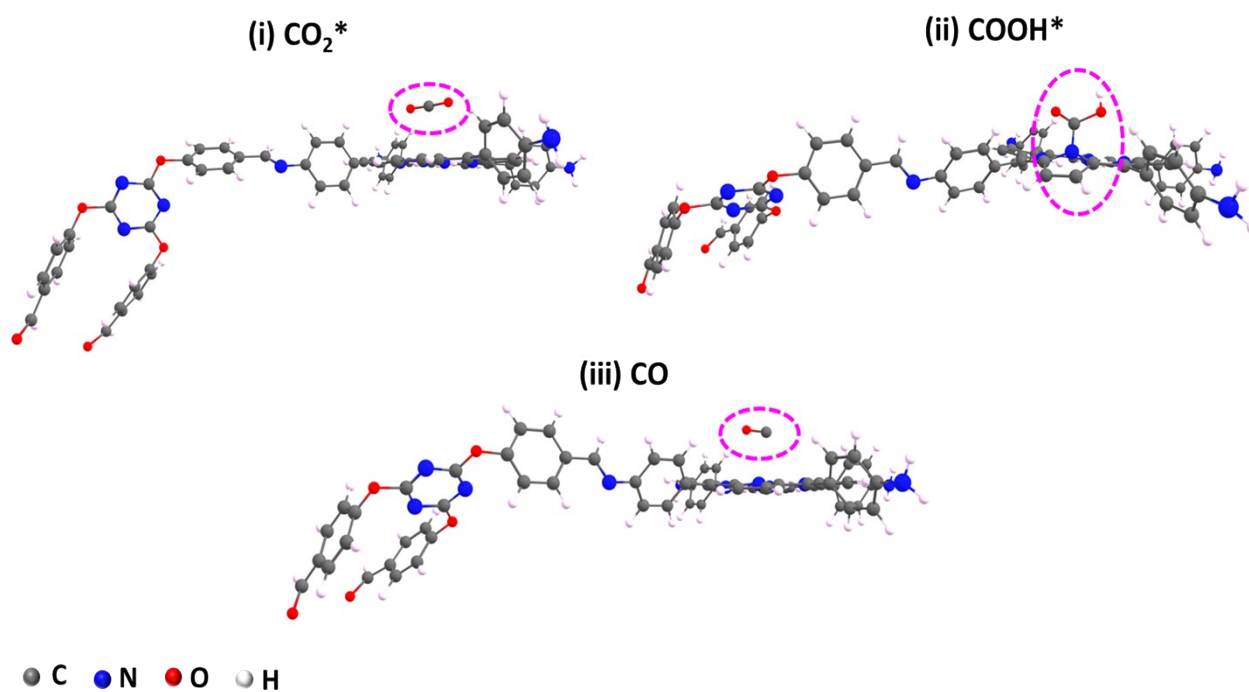

Fig. S20 Steps in Photocatalytic CO<sub>2</sub> reduction; (i) Activation of CO<sub>2</sub>, (ii) Formation of COOH intermediate and (iii) Desorption of CO from catalyst surface.

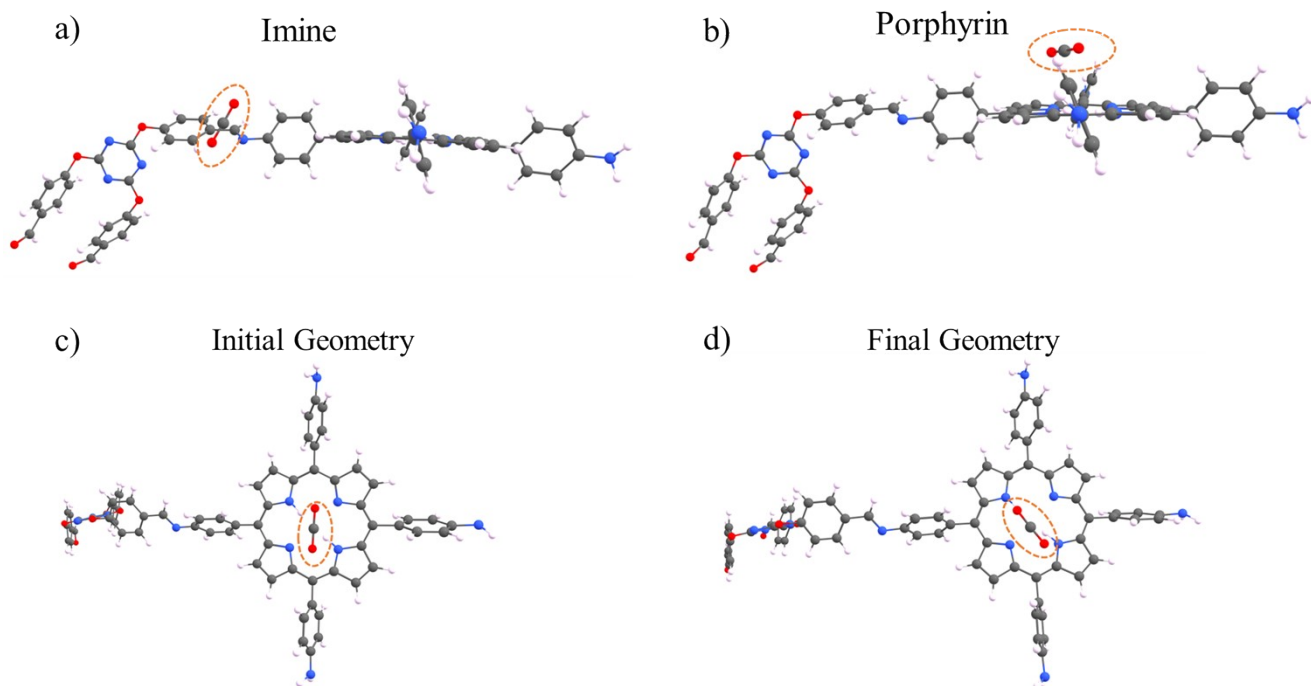

**Fig. S21** CO<sub>2</sub> adsorption at (a) Imine and (b) Porphyrin sites; (c) initial and (d) final optimized geometries for adsorption of CO<sub>2</sub> molecule at porphyrin sites.

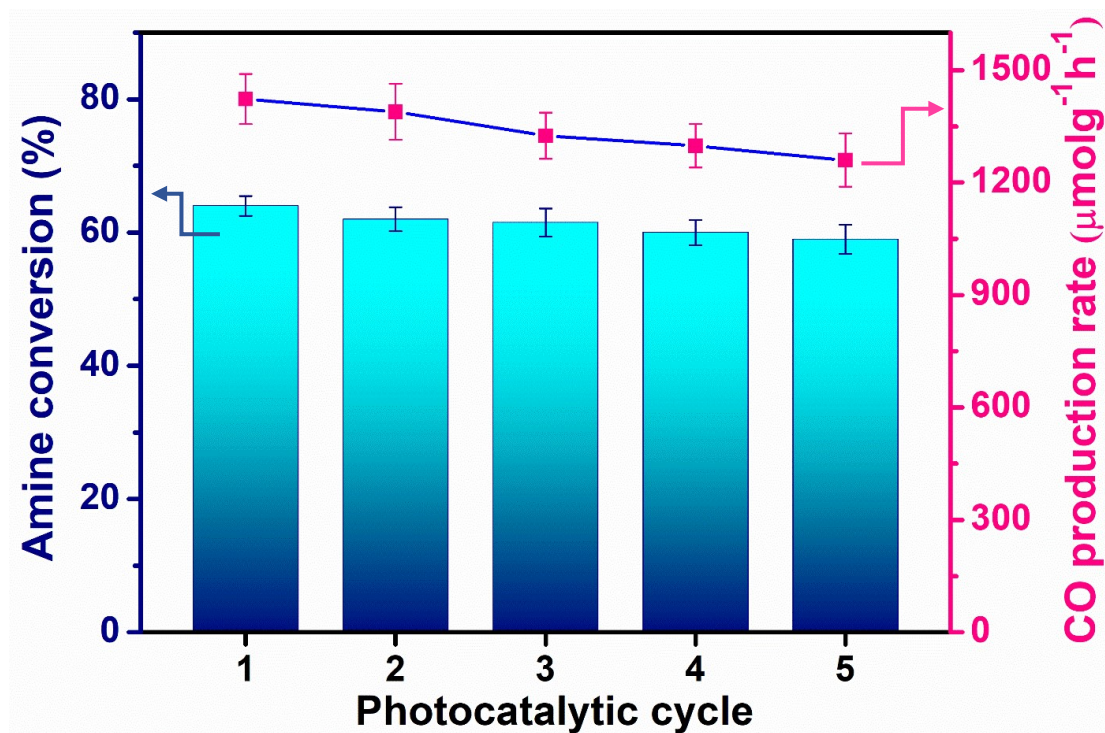

**Fig. S22** Photocatalytic performance of TPT-porp under 5 catalytic cycles.

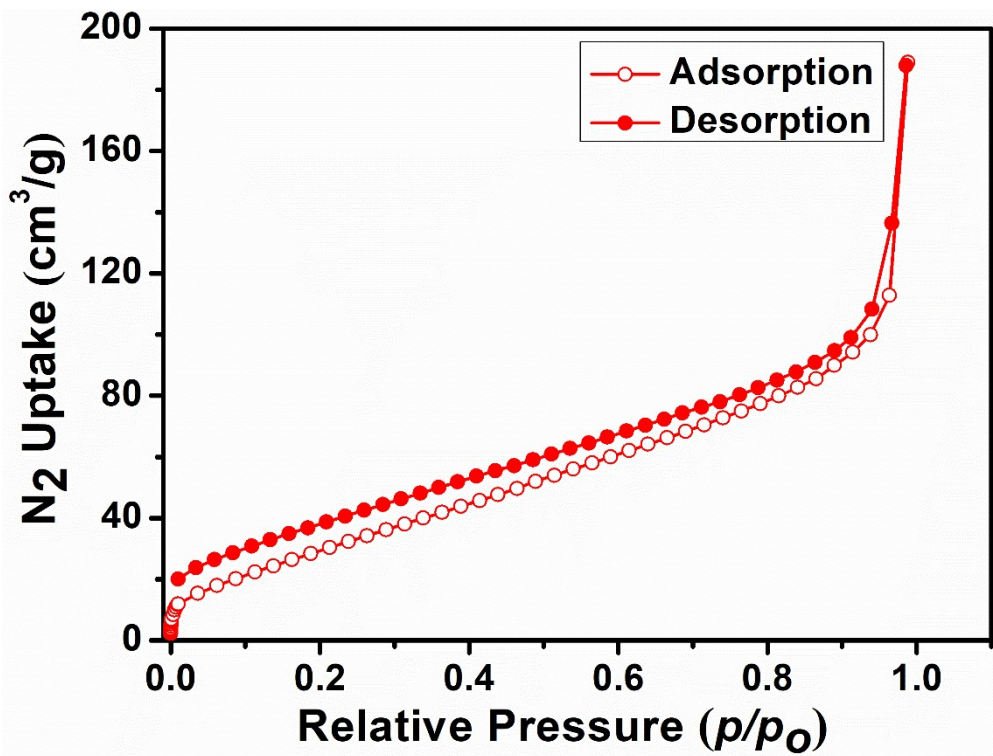

Fig. S23 N<sub>2</sub> sorption isotherm of TPT-porp after recyclability.

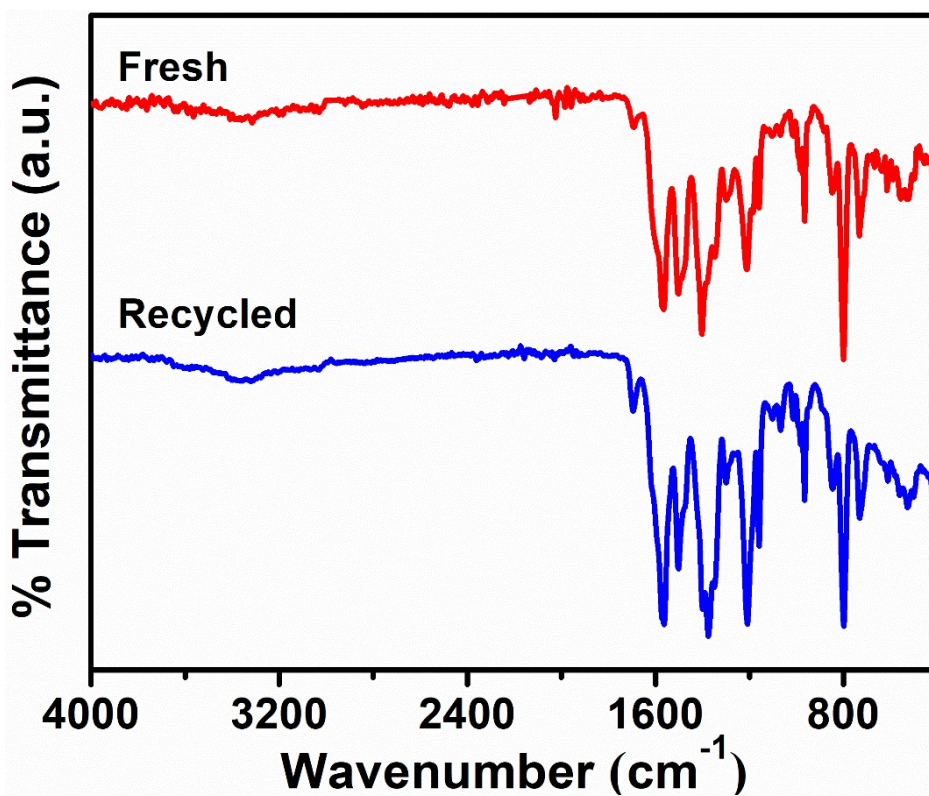

Fig. S24 FTIR spectra of fresh and recycled TPT-porp.



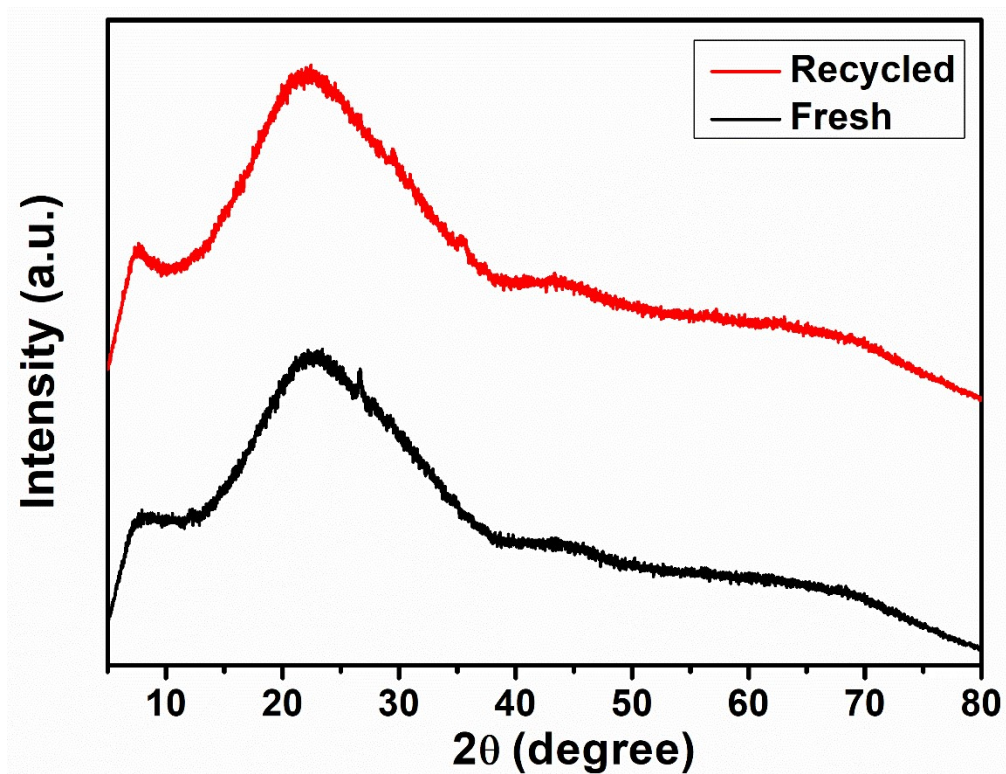

Fig. S25 PXR D spectra of fresh and recycled TPT-porp.

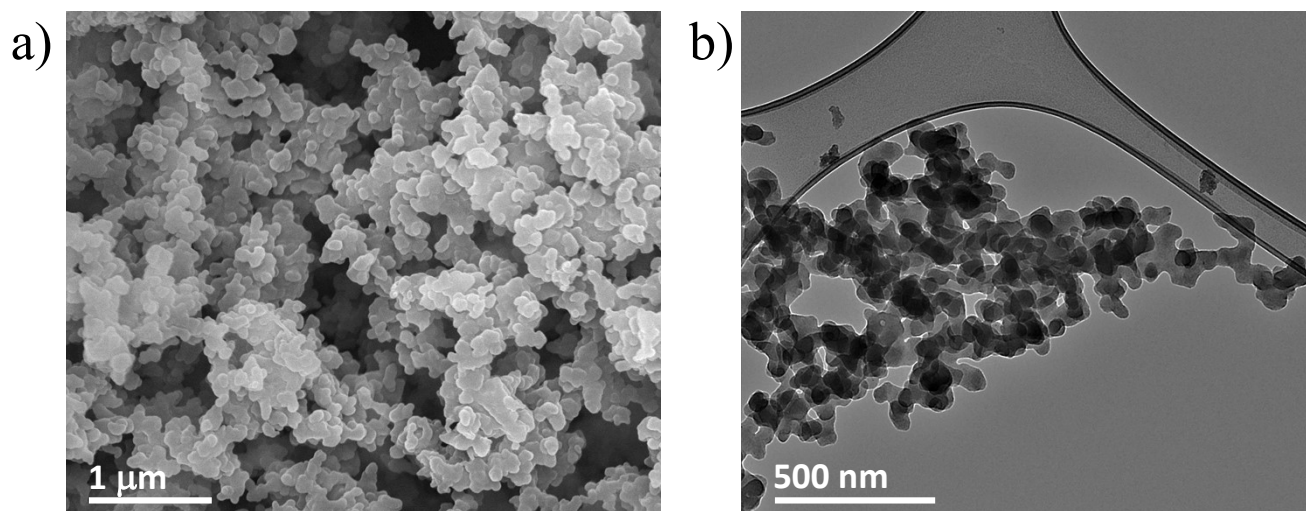

Fig. S26 a) FESEM and b) TEM images of TPT-porp after recyclability.

## Supplementary scheme:

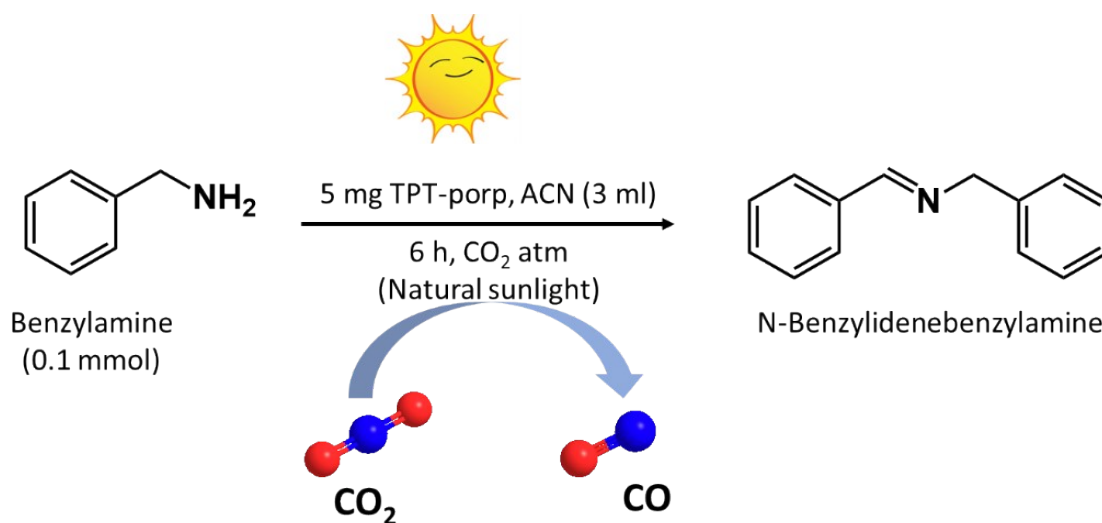

**Scheme S1** Reaction scheme for photoredox reaction catalysed by TPT-porp under natural sunlight.

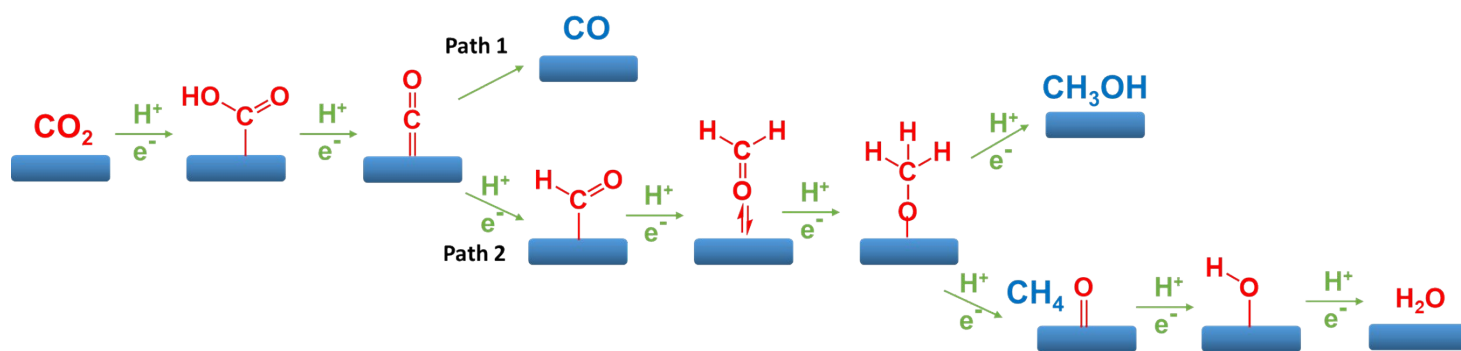

**Scheme S2** Steps involved in  $\text{CO}_2$  reduction pathway.

## Supplementary Tables:

**Table S1** Previously reported photocatalyst for simultaneous CO<sub>2</sub> reduction and oxidation of organic substrate.

| S. No.    | Catalyst                                                                          | Substrate          | Light source                            | Oxidation product (Activity and selectivity)                                                                                    | Reduction product (Activity and selectivity)                                                                                                                                | AQY/STF (%)                                | Ref              |
|-----------|-----------------------------------------------------------------------------------|--------------------|-----------------------------------------|---------------------------------------------------------------------------------------------------------------------------------|-----------------------------------------------------------------------------------------------------------------------------------------------------------------------------|--------------------------------------------|------------------|
| 1         | CdS-TiO <sub>2</sub>                                                              | Cyclohexanol       | 250 W high pressure Hg lamp             | Cyclohexanone (20 μmolg <sup>-1</sup> h <sup>-1</sup> ; N.A.)                                                                   | HCOOH (N.A.; N.A.), cyclohexyl formate (20.2 μmolg <sup>-1</sup> h <sup>-1</sup> ; N.A.)                                                                                    | N.A.                                       | 3                |
| 2         | Ag-TiO <sub>2</sub>                                                               | Benzyl Alcohol     | 300 W Xe lamp                           | Benzaldehyde (N.A.; 98%)                                                                                                        | CH <sub>3</sub> OH (7.47 μmolg <sup>-1</sup> h <sup>-1</sup> ; N.A.)                                                                                                        | N.A.                                       | 4                |
| 3         | Py-PCN (loaded with 3 wt% Pt)                                                     | Cyclohexene        | 300 W Xe lamp                           | Cyclohexanol (75 μmolg <sup>-1</sup> h <sup>-1</sup> ; N.A.)                                                                    | CO (28 μmolg <sup>-1</sup> h <sup>-1</sup> ; N.A.), HCOOH (55 μmolg <sup>-1</sup> h <sup>-1</sup> ; N.A.)                                                                   | N.A.                                       | 5                |
| 4         | Keplerate Mo132                                                                   | Phenylacetylene    | Blue LED light                          | Acetophenone (0.79 mmol; N.A.)                                                                                                  | HCOOH (0.12 mmol; N.A.)                                                                                                                                                     | N.A.                                       | 6                |
| 5         | Pd/TiO <sub>2</sub>                                                               | Ethane             | 300 W Xe lamp<br>UV light               | Ethene (230.5 μmolg <sup>-1</sup> h <sup>-1</sup> ; 95.42%)                                                                     | CO (120.4 μmolg <sup>-1</sup> h <sup>-1</sup> ; 44%), H <sub>2</sub> (162.2 μmolg <sup>-1</sup> h <sup>-1</sup> ; 55%)                                                      | 0.93%                                      | 7                |
| 6         | Cu <sub>2</sub> O/Cu                                                              | Benzyl Alcohol     | 300 W Xe lamp,<br>λ > 420 nm            | Benzylacetate (116.7 μmolg <sup>-1</sup> h <sup>-1</sup> ; N.A.)                                                                | CO (0.65 μmolg <sup>-1</sup> h <sup>-1</sup> ; N.A.), H <sub>2</sub> (1 μmolg <sup>-1</sup> h <sup>-1</sup> ; N.A.), HCOOH (2.5 μmolg <sup>-1</sup> h <sup>-1</sup> ; N.A.) | N.A.                                       | 8                |
| 7         | CdSe/CdS QDs                                                                      | 1-phenylethanol    | 450 nm LED light                        | Pinacol (26.5 mmolg <sup>-1</sup> h <sup>-1</sup> ; 96%)                                                                        | CO (27.63 mmolg <sup>-1</sup> h <sup>-1</sup> ; 94%)                                                                                                                        | N.A.                                       | 9                |
| 8         | g-CN/POM/[Re]                                                                     | Cyclohexene        | White LED light                         | 1,3 cyclohexadiene (72.5 μmolg <sup>-1</sup> h <sup>-1</sup> ; N.A.), benzene (11.3 μmolg <sup>-1</sup> h <sup>-1</sup> ; N.A.) | CO (127.5 μmolg <sup>-1</sup> h <sup>-1</sup> ; 100%)                                                                                                                       | N.A.                                       | 10               |
| 9         | CsPbBr <sub>3</sub> /Cs <sub>4</sub> PbBr <sub>6</sub>                            | CH <sub>3</sub> OH | 300 W Xe lamp                           | HCOOH (56.5 μmolg <sup>-1</sup> h <sup>-1</sup> ; N.A.)                                                                         | CO (120.16 μmolg <sup>-1</sup> h <sup>-1</sup> ; N.A.)                                                                                                                      | N.A.                                       | 11               |
| 10        | FAPbBr <sub>3</sub> /Bi <sub>2</sub> WO <sub>6</sub>                              | Benzyl Alcohol     | 300 W Xe lamp<br>AM 1.5G                | Benzaldehyde (250 μmolg <sup>-1</sup> h <sup>-1</sup> ; N.A.)                                                                   | CO (170 μmolg <sup>-1</sup> h <sup>-1</sup> ; ~100%)                                                                                                                        | 1.2 (λ=400 nm)                             | 12               |
| 11        | Black phosphorous QDs (BP)-ZnIn <sub>2</sub> S <sub>4</sub>                       | Benzylamine        | 300 W Xe lamp,<br>λ > 420 nm            | N-benzylidene-benzylamine (1400 μmolg <sup>-1</sup> h <sup>-1</sup> ; 94%)                                                      | CO (750 μmolg <sup>-1</sup> h <sup>-1</sup> ; 35%), H <sub>2</sub> (1360 μmolg <sup>-1</sup> h <sup>-1</sup> ; 65%)                                                         | 6.5% (λ=465 nm)                            | 13               |
| 12        | 3DOM CdSQD/NC                                                                     | Benzylamine        | 300 W Xe Lamp λ > 420 nm                | N-benzylidene-benzylamine (9.82 μmolg <sup>-1</sup> h <sup>-1</sup> ; 95.3%)                                                    | CO (5.21 μmolg <sup>-1</sup> h <sup>-1</sup> ; 89.6%)                                                                                                                       | 2.90 (λ=450 nm)                            | 14               |
| 13        | CN-KRb                                                                            | Ethanol            | 5 W white LED (100 mW/cm <sup>2</sup> ) | CH <sub>3</sub> CHO (1212.3 μmolg <sup>-1</sup> h <sup>-1</sup> ; 93%)                                                          | CH <sub>3</sub> CHO (1212.3 μmolg <sup>-1</sup> h <sup>-1</sup> ; 93%)                                                                                                      | N.A.                                       | 15               |
| 14        | ZnV <sub>2</sub> O <sub>6</sub> @WO <sub>3</sub> -g-C <sub>3</sub> N <sub>4</sub> | Benzylamine        | 350 W xenon lamp                        | N-benzylidene-benzylamine (yield = 55%)                                                                                         | CO (279 μmolg <sup>-1</sup> h <sup>-1</sup> ; N.A.), CH <sub>4</sub> (113 μmolg <sup>-1</sup> h <sup>-1</sup> ; N.A.)                                                       | N.A.                                       | 16               |
| <b>15</b> | <b>TPT-porp (metal-free)</b>                                                      | <b>Benzylamine</b> | <b>Natural sunlight</b>                 | <b>N-benzylidene-benzylamine (2123 μmolg<sup>-1</sup>h<sup>-1</sup>; 98%)</b>                                                   | <b>CO (1786 μmolg<sup>-1</sup>h<sup>-1</sup>; 93%)</b>                                                                                                                      | <b>AQY = 9.34% (λ=430 nm)/ STF = 0.24%</b> | <b>This work</b> |

N.A.- Not Applicable



**Table S2** Optimization of synthesis of TPT-porp.

| S. No.    | Solvent                                         | Temp/Time             | BET S.A. (m <sup>2</sup> /g) | Yield (%) |
|-----------|-------------------------------------------------|-----------------------|------------------------------|-----------|
| 1.        | Mesitylene/ 1,4-Dioxane/<br>6 M AcOH (1:2:0.2)  | 120 °C/ 3 days        | 44                           | 73        |
| 2.        | Mesitylene/ 1,4-Dioxane/<br>6 M AcOH (1:1:0.2)  | 120 °C/ 3 days        | 52                           | 78        |
| 3.        | o-DCB/ n-Butanol/ 6 M<br>AcOH (1:2:0.2)         | 120 °C/ 3 days        | 88                           | 82        |
| 4.        | o-DCB/ n-Butanol/ 6 M<br>AcOH (1:1:0.2)         | 120 °C/ 3 days        | 97                           | 80        |
| 5.        | o-DCB/ n-Butanol/ 12 M<br>AcOH (1:1:0.2)        | 120 °C/ 4 days        | 120                          | 84        |
| <b>6.</b> | <b>o-DCB/n-Butanol/ 12 M<br/>AcOH (1:1:0.2)</b> | <b>140 °C/ 4 days</b> | <b>248</b>                   | <b>85</b> |

**Reaction conditions:** TPT (1 eq), porp-NH<sub>2</sub> (0.75 eq), solvent, sealed under inert atmosphere.

S.A.- surface area

**Table S3** Elemental Analysis of TPT-porp under solvent free conditions.

| Elements | Experimental value (%) | Theoretical value (%) |
|----------|------------------------|-----------------------|
| <b>C</b> | 72.93                  | 75.95                 |
| <b>N</b> | 16.15                  | 14.76                 |
| <b>H</b> | 4.38                   | 3.89                  |

**Table S4** The sunlight intensities and temperatures during the photocatalytic study.

| S. No. | Date       | Temperature (°C)              |          |          |          |          |          |          | Average temperature (°C) | Average Sunlight intensity (mW/cm <sup>2</sup> ) |
|--------|------------|-------------------------------|----------|----------|----------|----------|----------|----------|--------------------------|--------------------------------------------------|
|        |            | Temperature at each hour (°C) |          |          |          |          |          |          |                          |                                                  |
| 1      | 24/06/2022 | 11:00 AM                      | 12:00 PM | 01:00 PM | 02:00 PM | 03:00 PM | 04:00 PM | 05:00 PM | 35.4                     | 52.19                                            |
|        |            | 33                            | 34       | 35       | 36       | 37       | 37       | 36       |                          |                                                  |
| 2      | 28/06/2022 | 11:00 AM                      | 12:00 PM | 01:00 PM | 02:00 PM | 03:00 PM | 04:00 PM | 05:00 PM | 38.4                     | 44.65                                            |
|        |            | 36                            | 37       | 38       | 39       | 40       | 40       | 39       |                          |                                                  |
| 3      | 04/07/2022 | 10:30 AM                      | 11:30 AM | 12:30 PM | 01:00 PM | 02:00 PM | 03:00 PM | 04:00 PM | 33.3                     | 22.38                                            |
|        |            | 34                            | 35       | 35       | 34       | 32       | 32       | 31       |                          |                                                  |
| 4      | 16/07/2022 | 10:00 AM                      | 11:00 AM | 12:00 PM | 01:00 PM | 02:00 PM | 03:00 PM | 04:00 PM | 33.1                     | 40.35                                            |
|        |            | 31                            | 34       | 35       | 36       | 34       | 32       | 30       |                          |                                                  |
| 5      | 24/07/2022 | 11:00 AM                      | 12:00 PM | 01:00 PM | 02:00 PM | 03:00 PM | 04:00 PM | 05:00 PM | 31.7                     | 37.74                                            |
|        |            | 31                            | 33       | 32       | 31       | 32       | 32       | 31       |                          |                                                  |
| 6      | 02/08/2022 | 10:30 AM                      | 11:30 AM | 12:30 PM | 01:00 PM | 02:00 PM | 03:00 PM | 04:00 PM | 33.0                     | 32.56                                            |
|        |            | 31                            | 32       | 33       | 34       | 35       | 34       | 32       |                          |                                                  |
| 7      | 09/08/2022 | 10:00 AM                      | 11:00 AM | 12:00 PM | 01:00 PM | 02:00 PM | 03:00 PM | 04:00 PM | 34.3                     | 57.64                                            |
|        |            | 32                            | 33       | 33       | 34       | 36       | 37       | 35       |                          |                                                  |
| 8      | 18/08/2022 | 11:00 AM                      | 12:00 PM | 01:00 PM | 02:00 PM | 03:00 PM | 04:00 PM | 05:00 PM | 33.8                     | 55.47                                            |
|        |            | 32                            | 33       | 34       | 35       | 35       | 34       | 34       |                          |                                                  |

|    |            |          |          |          |          |          |          |          |      |       |
|----|------------|----------|----------|----------|----------|----------|----------|----------|------|-------|
| 9  | 26/08/2022 | 12:00 PM | 01:00 PM | 02:00 PM | 03:00 PM | 04:00 PM | 05:00 PM | 06:00 PM | 33.7 | 50.98 |
|    |            | 33       | 34       | 34       | 35       | 35       | 34       | 34       |      |       |
| 10 | 05/09/2022 | 11:00 AM | 12:00 PM | 01:00 PM | 02:00 PM | 03:00 PM | 04:00 PM | 05:00 PM | 33.3 | 26.82 |
|    |            | 33       | 34       | 34       | 35       | 34       | 33       | 33       |      |       |
| 11 | 21/09/2022 | 10:00 AM | 11:00 AM | 12:00 PM | 01:00 PM | 02:00 PM | 03:00 PM | 04:00 PM | 31.8 | 39.27 |
|    |            | 30       | 31       | 32       | 32       | 33       | 33       | 32       |      |       |

**Table S5** Wavelength dependent Apparent Quantum Yield (AQY%) for CO.

| S. No. | Wavelength $\lambda$ (nm) | Intensity I ( $\text{Wcm}^{-2}$ ) | Amount of CO $\eta_{\text{CO}}$ (mol) | AQY (%) |
|--------|---------------------------|-----------------------------------|---------------------------------------|---------|
| 1.     | 400                       | 0.00084                           | $4.08 \times 10^{-6}$                 | 6.27    |
| 2.     | 430                       | 0.00046                           | $3.57 \times 10^{-6}$                 | 9.34    |
| 3.     | 450                       | 0.00117                           | $4.35 \times 10^{-6}$                 | 4.26    |
| 4.     | 500                       | 0.00166                           | $5.11 \times 10^{-6}$                 | 3.17    |
| 5.     | 550                       | 0.00210                           | $7.88 \times 10^{-6}$                 | 3.52    |
| 6.     | 600                       | 0.00200                           | $3.09 \times 10^{-6}$                 | 1.33    |

**Conditions:** TPT-porp (5 mg), light source- 400 W Xenon lamp using band pass filters of different wavelength, Irradiation time ( $t = 2$  h), Area of irradiation ( $A = 6.44 \text{ cm}^2$ )

**Table S6** Substrate scope of simultaneous CO<sub>2</sub> reduction and oxidative amine homocoupling.

| S. No. | Substrate                                                                          | Product                                                                            | Oxidation product | Reduction Product                                            |                                                           | e <sup>-</sup> /h <sup>+</sup> ratio <sup>c</sup> |
|--------|------------------------------------------------------------------------------------|------------------------------------------------------------------------------------|-------------------|--------------------------------------------------------------|-----------------------------------------------------------|---------------------------------------------------|
|        |                                                                                    |                                                                                    |                   | Imine <sup>a</sup><br>( $\mu\text{molg}^{-1}\text{h}^{-1}$ ) | CO <sup>b</sup><br>( $\mu\text{molg}^{-1}\text{h}^{-1}$ ) |                                                   |
| 1      | 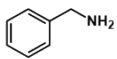  |   | 2123              | 1786                                                         | 114                                                       | 1.08                                              |
| 2      |   |   | 2360              | 2498                                                         | 53                                                        | 1.14                                              |
| 3      |   |   | 1422              | 1370                                                         | 80                                                        | 1.17                                              |
| 4      |   |   | 1815              | 1934                                                         | 73                                                        | 1.22                                              |
| 5      |   |   | 1184              | 1665                                                         | 79                                                        | 0.97                                              |
| 6      |  |  | 1190              | 1249                                                         | 43                                                        | 1.19                                              |

**Reaction Conditions:** Amine (0.1 mmol), photocatalyst TPT-porp (5 mg), ACN (3 ml), time 6 h, and natural sunlight.

<sup>a</sup>determined by GCMS

<sup>b</sup>determined by GC

<sup>c</sup>The ratio of consumption of electrons to holes in redox process is calculated using the formula  $n(e^-)/n(h^+)$   
 $n(e^-) = 2 \cdot n(\text{CO}) + 8 \cdot n(\text{CH}_4)$  and  $n(h^+) = 2 \cdot n(\text{imine})$

where  $n(\text{CO})$ ,  $n(\text{CH}_4)$  and  $n(\text{imine})$  are the rate of formation of CO, CH<sub>4</sub> and imine respectively (in  $\mu\text{molg}^{-1}\text{h}^{-1}$ )



**Table S7** Total energy (eV) directly obtained from DFT of the pristine TPT-porp, corresponding intermediates and species.

| Species           | Gibbs free energies, $\Delta G$ (eV) |
|-------------------|--------------------------------------|
| Catalyst (*)      | -3596.559763                         |
| CO <sub>2</sub>   | -188.597975                          |
| CO <sub>2</sub> * | -3785.150649                         |
| COOH*             | -3785.688547                         |
| CO*               | -3709.875894                         |
| CHO*              | -3710.411678                         |
| CO                | -113.325129                          |

**Table S8** Gibbs free energy ( $\Delta G$ ) in eV for adsorption of CO<sub>2</sub> at porphyrin and imine

| Active site      | Gibbs free energy (Eh) | Rel. Gibbs free energy diff. (kJ/mol) |
|------------------|------------------------|---------------------------------------|
| Imine            | -3785.147619           | 7.95                                  |
| <b>Porphyrin</b> | <b>-3785.150649</b>    | <b>0</b>                              |

**Table S9** Relative Gibbs free energy ( $\Delta G$ ) in eV of CO<sub>2</sub> photoreduction for the TPT-porp and corresponding intermediates.

| Catalyst        | $\Delta G_{[\text{COOH}^*]}$ | $\Delta G_{[\text{CO}^*]}$ | $\Delta G_{[\text{CO}]}$ | $\Delta G_{[\text{CHO}^*]}$ |
|-----------------|------------------------------|----------------------------|--------------------------|-----------------------------|
| <b>TPT-porp</b> | 1.52                         | 0.9                        | 0.657                    | 2.28                        |

## References

- 1 D. C. Tahmassebi, T. Sasaki, *J. Org. Chem.* 1994, **59**, 679–681.
- 2 M. Dinari, M. Hatami, *J. Environ. Chem. Eng.* 2019, **7**, 102907.
- 3 G. Song, F. Xin, J. Chen, X. Yin, *App. Catal. A: Gen.* 2014, **473**, 90–95.
- 4 L. Wang, X. Zhang, L. Yang, C. Wang, H. Wang, *Catal. Sci. Technol.* 2015, **5**, 4800–4805.
- 5 X. Gong, S. Yu, M. Guan, X. Zhu, C. Xue, *J. Mater. Chem. A* **2019**, **7**, 7373–7379.
- 6 J. Lodh, A. Mallick, S. Roy, *J. Mater. Chem. A* 2018, **6**, 20844–20851.
- 7 R. Zhang, H. Wang, S. Tang, C. Liu, F. Dong, H. Yue, B. Liang, *ACS Catal.* 2018, **8**, 9280–9286.
- 8 Y. Chen, M. Wang, Y. Ma, Y. Li, J. Cai, Z. Li, *Catal. Sci. Technol.* **2018**, **8**, 2218–2223.
- 9 Q. Guo, F. Liang, X.-B. Li, Y.-J. Gao, M.-Y. Huang, Y. Wang, S.-G. Xia, X.-Y. Gao, Q.-C. Gan, Z.-S. Lin, C.-H. Tung, L.-Z. Wu, *Chem* 2019, **5**, 2605–2616.
- 10 H. Yu, E. Haviv, R. Neumann, *Angew. Chem. Int. Ed.* 2020, **132**, 6278–6282.
- 11 G.-X. Dong, W. Zhang, Y.-F. Mu, K. Su, M. Zhang, T.-B. Lu, *Chem. Commun.* 2020, **56**, 4664–4667.
- 12 H. Huang, J. Zhao, Y. Du, C. Zhou, M. Zhang, Z. Wang, Y. Weng, J. Long, J. Hofkens, J. A. Steele, M. B. J. Roeffaers, *ACS Nano* 2020, **14**, 16689–16697.
- 13 C. Han, Y. Li, J. Li, M. Qi, Z. Tang, Y. Xu, *Angew. Chem. Int. Ed.* 2021, **133**, 8041–8049.
- 14 F. Wang, T. Hou, X. Zhao, W. Yao, R. Fang, K. Shen, Y. Li, *Adv. Mater.* 2021, **33**, 2102690.
- 15 Q. Liu, J. Lin, H. Cheng, L. Wei, F. Wang, *Angew. Chem. Int. Ed.* 2023, **62**, e202218720.
- 16 P. K. Prajapati, N. Saini, D. K. Chauhan, K. Kailasam, *J. Mater. Chem. A* 2022, **11**, 385–400.
